# Supplementary material for: Evaluation of Different Methods and Models for Grass Cereals’ Production Estimation: Case Study in Wheat
Source: MDPI journal article supplement (doi:10.3390/agronomy13061500), 2023-05-30
Supplement: s1 [file s1]

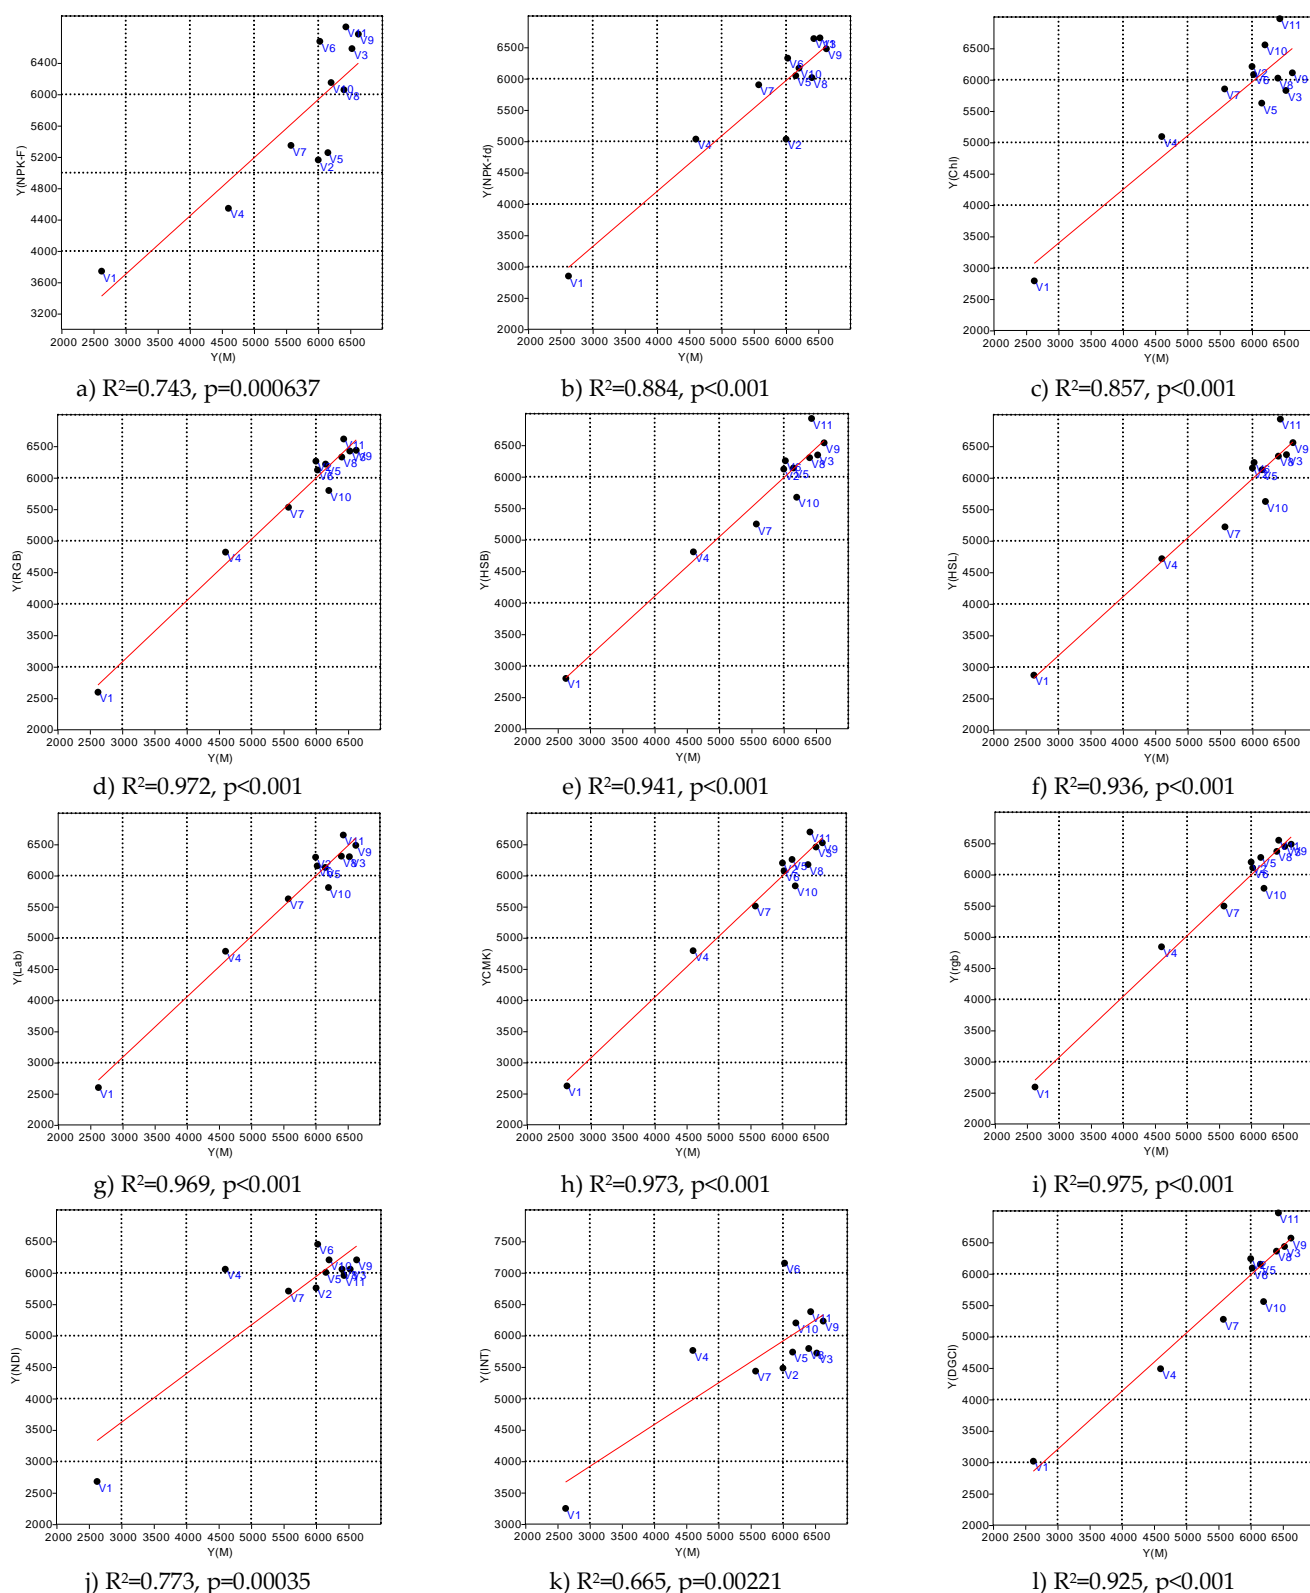

**Figure S1.** Fittings between measured and estimated production: a) Y(F) – applied fertilizers; b) Y(NPK-fd) – foliar diagnoses; c) Y(Chl) – physiological indices (Chl); d) Y(RGB) – color parameter RGB system; e) Y(HSB) – color parameter HSB system; f) Y(HSL) – color parameter HSL system; g) Y(Lab) – color parameter CIELab system; h) Y(CMK) – color parameter CMIK system; i) Y(rgb) – normalized values RGB system; j) Y(NDI) – normalized difference index; k) Y(INT) – intensity; l) Y(DGCI) – dark green color index.

1  
2  
3  
4  
5  
6

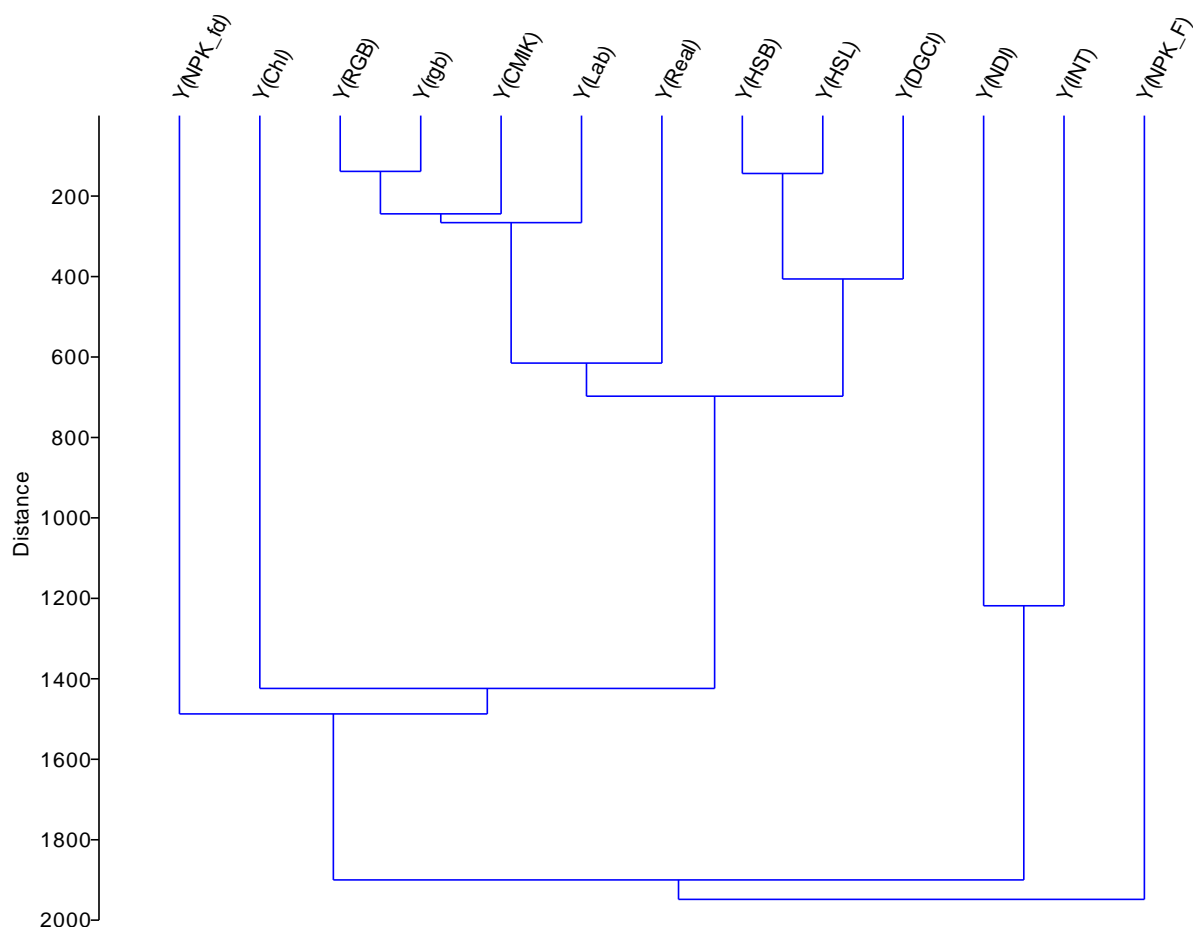

**Figure S2.** Dendrogram of the wheat production estimation models association, based on similarity according to the production values estimated on the experimental variants, and real production.

**Table S1.** Similarity and distance indices values to quantify the similarity level between the real production and the productions estimated by different models.

|           | Y (Re-<br>al) | Y<br>(NPK_F) | Y<br>(NPK_fd) | Y<br>(Chl) | Y<br>(RGB) | Y<br>(HSB) | Y<br>(HSL) | Y<br>(Lab) | Y<br>(CMIK) | Y<br>(rgb) | Y<br>(NDI) | Y<br>(INT) | Y<br>(DGCI) |
|-----------|---------------|--------------|---------------|------------|------------|------------|------------|------------|-------------|------------|------------|------------|-------------|
| Y(Real)   | 0             | 1886         | 1269.3        | 1408       | 617.99     | 903.45     | 940.59     | 649.29     | 606.51      | 587.46     | 1772.6     | 2155.1     | 1017.4      |
| Y(NPK_F)  | 1886          | 0            | 1500.5        | 2056.7     | 2063.6     | 1802.2     | 1786.6     | 2036       | 1999.8      | 2073.5     | 2434.6     | 1905.5     | 1832.2      |
| Y(NPK_fd) | 1269.3        | 1500.5       | 0             | 1644.3     | 1455.1     | 1476.1     | 1551.5     | 1471.1     | 1383        | 1433.2     | 1595.9     | 1711.5     | 1701.8      |
| Y(Chl)    | 1408          | 2056.7       | 1644.3        | 0          | 1350.7     | 1431.9     | 1512.1     | 1248.5     | 1349.3      | 1442.7     | 1631.9     | 1754.6     | 1646.8      |
| Y(RGB)    | 617.99        | 2063.6       | 1455.1        | 1350.7     | 0          | 539.98     | 602.89     | 195.9      | 224.53      | 138.47     | 1684.6     | 2065.6     | 748.11      |
| Y(HSB)    | 903.45        | 1802.2       | 1476.1        | 1431.9     | 539.98     | 0          | 143.69     | 565.15     | 505.37      | 564.54     | 1855.9     | 1960.8     | 467.81      |
| Y(HSL)    | 940.59        | 1786.6       | 1551.5        | 1512.1     | 602.89     | 143.69     | 0          | 626.01     | 575.7       | 625.01     | 1968       | 2044.2     | 343.86      |
| Y(Lab)    | 649.29        | 2036         | 1471.1        | 1248.5     | 195.9      | 565.15     | 626.01     | 0          | 303.87      | 298.45     | 1691.8     | 2030.5     | 764.42      |
| Y(CMIK)   | 606.51        | 1999.8       | 1383          | 1349.3     | 224.53     | 505.37     | 575.7      | 303.87     | 0           | 264.04     | 1733.5     | 2073.2     | 708.38      |
| Y(rgb)    | 587.46        | 2073.5       | 1433.2        | 1442.7     | 138.47     | 564.54     | 625.01     | 298.45     | 264.04      | 0          | 1668       | 2078.1     | 775.93      |
| Y(NDI)    | 1772.6        | 2434.6       | 1595.9        | 1631.9     | 1684.6     | 1855.9     | 1968       | 1691.8     | 1733.5      | 1668       | 0          | 1218.3     | 2226        |
| Y-INT     | 2155.1        | 1905.5       | 1711.5        | 1754.6     | 2065.6     | 1960.8     | 2044.2     | 2030.5     | 2073.2      | 2078.1     | 1218.3     | 0          | 2297.8      |
| Y-DGCI    | 1017.4        | 1832.2       | 1701.8        | 1646.8     | 748.11     | 467.81     | 343.86     | 764.42     | 708.38      | 775.93     | 2226       | 2297.8     | 0           |

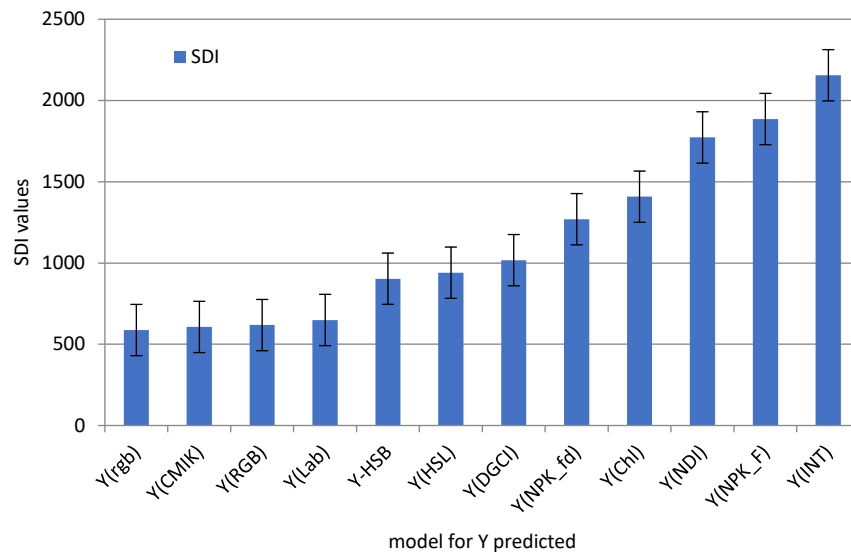

**Figure S3.** Graphic distribution of the SDI values, in relation to the production estimation models and real production (the lower DSI value is better).
